# Supplementary material for: Mussel inspired modification of carbon nanotubes using RAFT derived stimuli-responsive polymers
Source: Royal Society of Chemistry journal article supplement (doi:10.1039/c3ra44277b), 2013-01-01
Supplement: c3ra44277b.pdf [file c3ra44277b.pdf]

## Supporting information

# Mussel Inspired Modification of Carbon Nanotubes Using RAFT Derived Stimuli-responsive Polymers

Xiaoyong Zhang<sup>a,#,\*</sup>, Jinzhao Ji<sup>b,#</sup>, Xiqi Zhang<sup>b</sup>, Bin Yang<sup>b</sup>, Meiyong Liu<sup>c</sup>, Wanyun liu<sup>a</sup>, Lei Tao<sup>b</sup>,  
Yiwang Chen<sup>a</sup>, Yen Wei<sup>b,\*</sup>

<sup>a</sup> Department of Chemistry/Institute of Polymers, Nanchang University, 999 Xuefu Avenue, Nanchang 330031, China. <sup>b</sup> Department of Chemistry and the Tsinghua Center for Frontier Polymer Research, Tsinghua University, Beijing, 100084, P. R. China. <sup>c</sup> Beijing National Laboratory for Molecular Sciences (BNLMS), Key Laboratory of Organic Solids, Laboratory of New Materials, Institute of Chemistry, Chinese Academy of Sciences, Beijing 100190, China.

[xiaoyongzhang1980@gmail.com](mailto:xiaoyongzhang1980@gmail.com); [weiyen@tsinghua.edu.cn](mailto:weiyen@tsinghua.edu.cn)

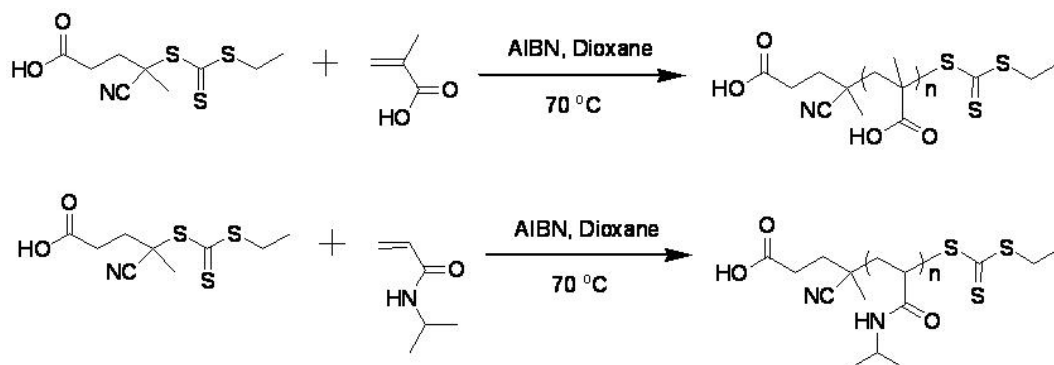

Scheme S1 RAFT polymerization of PMAA and PNIPAM.

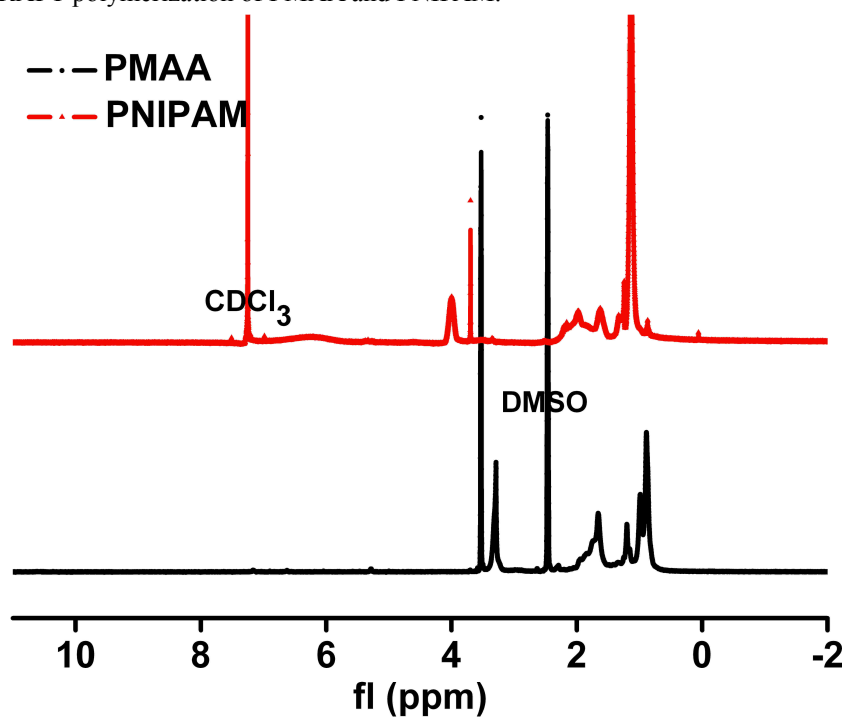

Fig. S1  $^1\text{H}$  NMR spectra of PMAA and PNIPAM which were measured in  $\text{CDCl}_3$  and DMSO, respectively.

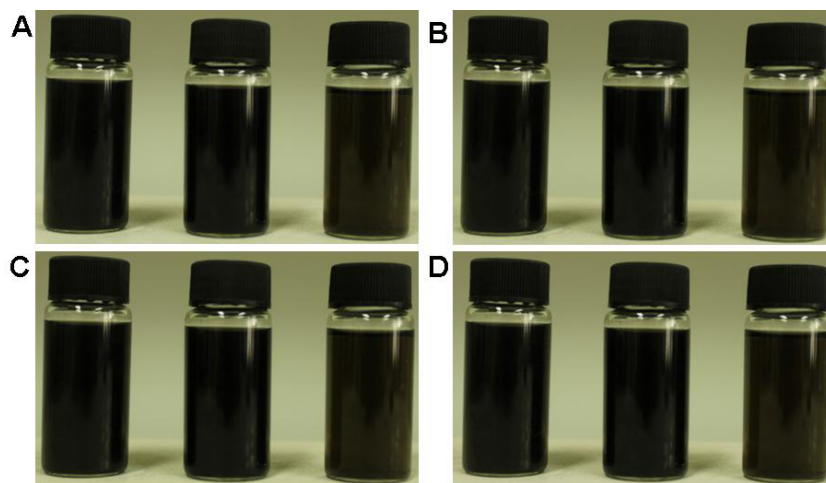

Fig. S2 Water dispersion of CNT-PDA-PNIPAM-1, CNT-PDA-PNIPAM-2, CNT-PDA-PNIPAM-3. (A) just disposition, (B) 24 h, (C) 48 h, (D) 72 h.

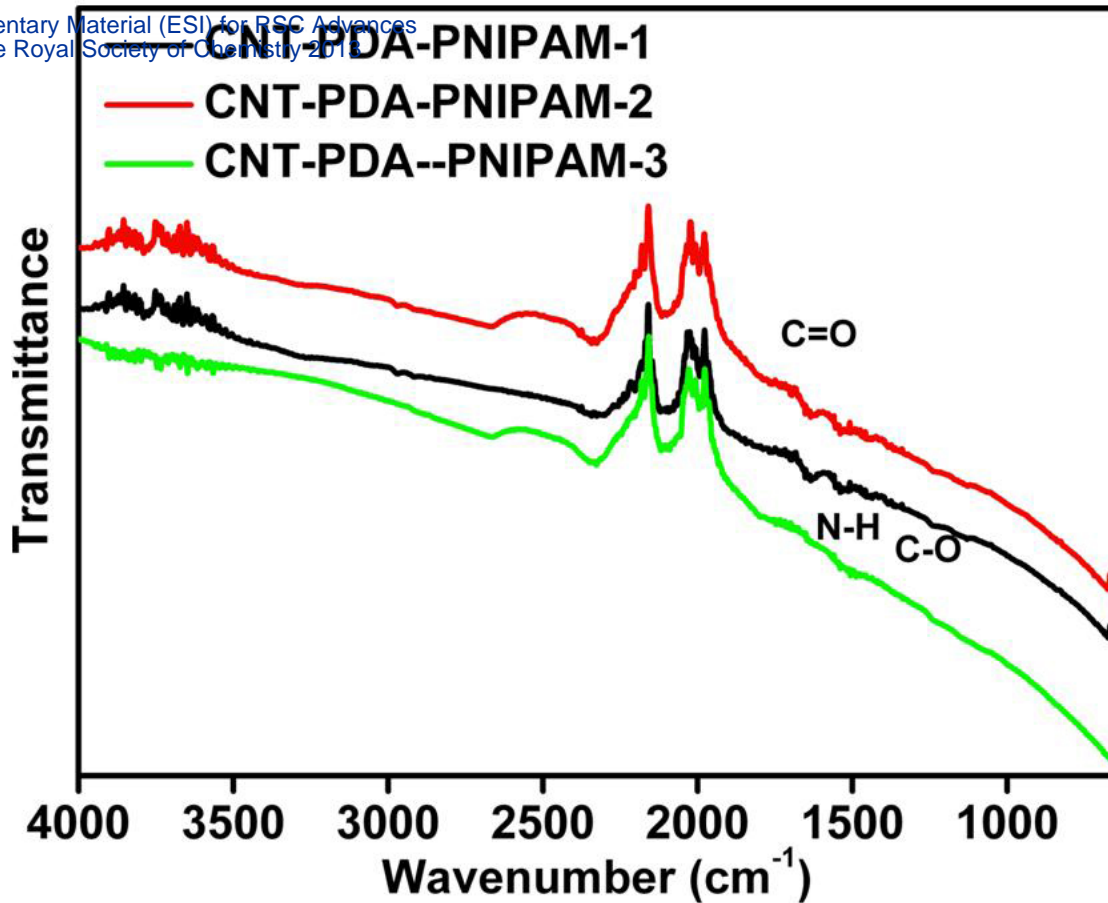

Fig. S3 FT-IR characterization of CNT-PDA-PNIPAM-1, CNT-PDA-PNIPAM-2, CNT-PDA-PNIPAM-3.

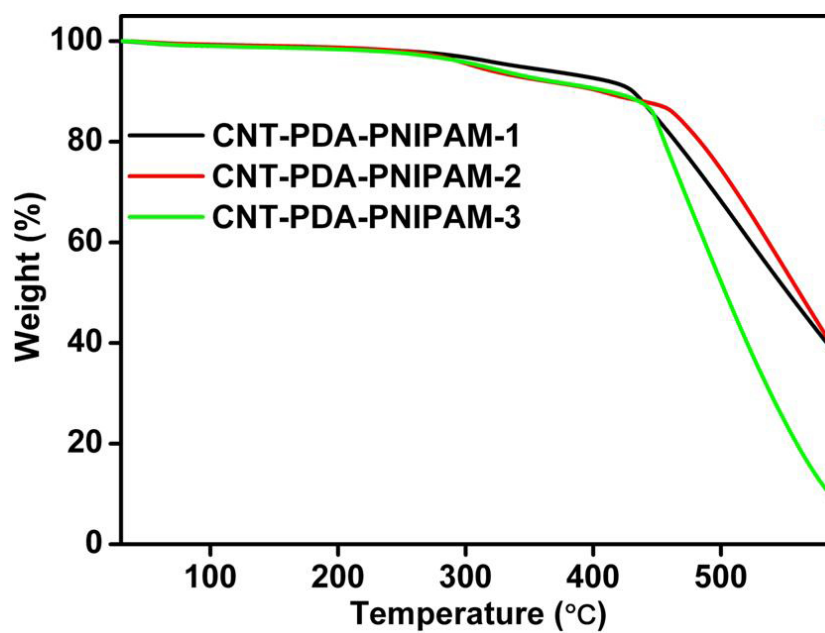

Fig. S4 TGA characterization of CNT-PDA-PNIPAM-1, CNT-PDA-PNIPAM-2, CNT-PDA-PNIPAM-3.
